# Supplementary material
Source: HighWire-hosted journal article supplement (https://www.cmajopen.ca/highwire/filestream/80824/field_highwire_adjunct_files/2/open-2014-0018-original-submission.pdf)
Supplement: open-2014-0018-original-submission.pdf [file open-2014-0018-original-submission.pdf]

**Risk factors for mortality among Canadian patients with Staphylococcus aureus bacteremia: a retrospective cohort study**

|                               |                                                                                                                                                                                                                                                                                                                                                                                                                                                                                                                                                                                                                                                                                                                                                                                                                                                                                                                                                                                                                                                                                                                                                                                                                      |
|-------------------------------|----------------------------------------------------------------------------------------------------------------------------------------------------------------------------------------------------------------------------------------------------------------------------------------------------------------------------------------------------------------------------------------------------------------------------------------------------------------------------------------------------------------------------------------------------------------------------------------------------------------------------------------------------------------------------------------------------------------------------------------------------------------------------------------------------------------------------------------------------------------------------------------------------------------------------------------------------------------------------------------------------------------------------------------------------------------------------------------------------------------------------------------------------------------------------------------------------------------------|
| Journal:                      | <i>CMAJ</i>                                                                                                                                                                                                                                                                                                                                                                                                                                                                                                                                                                                                                                                                                                                                                                                                                                                                                                                                                                                                                                                                                                                                                                                                          |
| Manuscript ID:                | CMAJ-14-0153                                                                                                                                                                                                                                                                                                                                                                                                                                                                                                                                                                                                                                                                                                                                                                                                                                                                                                                                                                                                                                                                                                                                                                                                         |
| Manuscript Type:              | Research - Cohort study (retrospective)                                                                                                                                                                                                                                                                                                                                                                                                                                                                                                                                                                                                                                                                                                                                                                                                                                                                                                                                                                                                                                                                                                                                                                              |
| Date Submitted by the Author: | 07-Feb-2014                                                                                                                                                                                                                                                                                                                                                                                                                                                                                                                                                                                                                                                                                                                                                                                                                                                                                                                                                                                                                                                                                                                                                                                                          |
| Complete List of Authors:     | Anantha, Ram; Western University, Division of General Surgery<br>Jegatheswaran, Januvi; Western University, Schulich School of Medicine and Dentistry<br>Pepe, Daniel; Western University, Schulich School of Medicine and Dentistry<br>Priestap, Fran; Western University, Division of Critical Care Medicine, Department of Medicine, Schulich School of Medicine and Dentistry<br>Delpont, Johan; Western University, Department of Pathology, Schulich School of Medicine and Dentistry<br>Haeryfar, S.M. Mansour; Western University, Department of Microbiology and Immunology, Schulich School of Medicine and Dentistry<br>McCormick, John; Western University, Department of Microbiology and Immunology, Schulich School of Medicine and Dentistry<br>Mele, Tina; Western University, Division of General Surgery, Department of Surgery, Schulich School of Medicine and Dentistry                                                                                                                                                                                                                                                                                                                        |
| Keywords:                     | Infectious Diseases, Microbiology, Statistics and Research Methods                                                                                                                                                                                                                                                                                                                                                                                                                                                                                                                                                                                                                                                                                                                                                                                                                                                                                                                                                                                                                                                                                                                                                   |
| More Detailed Keywords:       | Staphylococcus aureus, bacteremia, MRSA, health outcomes research                                                                                                                                                                                                                                                                                                                                                                                                                                                                                                                                                                                                                                                                                                                                                                                                                                                                                                                                                                                                                                                                                                                                                    |
| Abstract:                     | <p>Introduction: Staphylococcus aureus bacteremia (SAB) is a persistent and challenging disease, with few recent studies assessing its scope and burden in a Canadian population. We evaluated the magnitude of SAB in a large cohort of patients, and identified risk factors associated with increased mortality.</p> <p>Methods: We retrospectively reviewed adult (&gt;18 years old) patients admitted with SAB between 2008 and 2012 at a regional tertiary-care centre in Southwestern Ontario. Hospital records were used to identify comorbidities, complications of SAB such as sepsis and need for mechanical ventilation (MV), and mortality. Multivariable logistic regression was performed to determine predictors of overall, in-hospital, and post-discharge mortality.</p> <p>Results: We identified 1114 patients in our study. The proportion of methicillin-resistant <i>S. aureus</i> (MRSA) strains rose significantly during the study period (<math>p= 0.045</math>), while in-hospital mortality declined significantly (29% in 2008 to 11% in 2012, <math>p&lt; 0.0001</math>). Age, MRSA, sepsis, admission to the intensive care unit, hepatic failure, prolonged (&gt; 21 days) MV,</p> |

1  
2  
3  
4  
5  
6  
7  
8  
9  
10  
11  
12  
13  
14  
15  
16  
17  
18  
19  
20  
21  
22  
23  
24  
25  
26  
27  
28  
29  
30  
31  
32  
33  
34  
35  
36  
37  
38  
39  
40  
41  
42  
43  
44  
45  
46  
47  
48  
49  
50  
51  
52  
53  
54  
55  
56  
57  
58  
59  
60

|  |                                                                                                                                                                                                                                                                                                                                                                                                                                                                                                                                                                                                                                                                                                                                                                  |
|--|------------------------------------------------------------------------------------------------------------------------------------------------------------------------------------------------------------------------------------------------------------------------------------------------------------------------------------------------------------------------------------------------------------------------------------------------------------------------------------------------------------------------------------------------------------------------------------------------------------------------------------------------------------------------------------------------------------------------------------------------------------------|
|  | <p>chronic obstructive pulmonary disease (COPD), and malignancy (primary and metastatic) were associated with overall mortality and— with the exception of COPD and primary malignancy— in-hospital mortality. In contrast, peripheral vascular and cerebrovascular disease, COPD, diabetes, and malignancy (solid and hematogenous) were associated with increased post-discharge mortality.</p> <p>Interpretation: This study features one of the largest retrospective cohort studies of SAB in Canada, and identifies key factors associated with in-hospital and post-discharge mortality. Identification of these predictors may guide empiric therapy and provide prognostic clarity for patients with SAB during and after their hospital admission.</p> |
|  |                                                                                                                                                                                                                                                                                                                                                                                                                                                                                                                                                                                                                                                                                                                                                                  |

SCHOLARONE™  
Manuscripts

Confidential

1  
2  
3  
4  
5  
6  
7  
8  
9  
10  
11  
12  
13  
14  
15  
16  
17  
18  
19  
20  
21  
22  
23  
24  
25  
26  
27  
28  
29  
30  
31  
32  
33  
34  
35  
36  
37  
38  
39  
40  
41  
42  
43  
44  
45  
46  
47  
48  
49  
50  
51  
52  
53  
54  
55  
56  
57  
58  
59  
60

**Risk factors for mortality among Canadian patients with *Staphylococcus aureus* bacteremia: a retrospective cohort study**

Running Title: *Staphylococcus aureus* bacteremia in a Canadian population

Ram Venkatesh Anantha<sup>1,4</sup>, Januvi Jegatheswaran<sup>2,\*</sup>, Daniel Luke Pepe<sup>2,\*</sup>, Fran Priestap<sup>5</sup>, Johan Delpont<sup>3</sup>, S.M. Mansour Haeryfar<sup>4</sup>, John K. McCormick<sup>4</sup>, Tina Mele<sup>1,4,5</sup>

<sup>1</sup>Division of General Surgery, Department of Surgery, Schulich School of Medicine and Dentistry, Western University, London, ON, Canada

<sup>2</sup>Schulich School of Medicine and Dentistry, Western University, London, ON, Canada

<sup>3</sup>Department of Pathology, Schulich School of Medicine and Dentistry, Western University, London, ON, Canada

<sup>4</sup>Department of Microbiology and Immunology, Schulich School of Medicine and Dentistry, Western University, London, ON, Canada

<sup>5</sup>Division of Critical Care Medicine, Department of Medicine, Schulich School of Medicine and Dentistry, Western University, London, ON, Canada

\*Both authors contributed equally to this work.

**Corresponding authors:**

Dr. Tina Mele, MD PhD FRCSC; Room A8-124, Division of General Surgery and Critical Care, Western University, 339 Windermere Road, London, ON, N6A 5A5 (Phone: 519-663-3970; Fax: 519-663-3459; Email: [tina.mele@lhsc.on.ca](mailto:tina.mele@lhsc.on.ca)) **OR** Dr. John K. McCormick PhD; Siebens-Drake Research Institute Rm. 133; Department of Microbiology and Immunology, Schulich School of Medicine and Dentistry, Western University, 1200 Richmond Road, London, ON, Canada, N6A5A5 (Phone: Fax: Email: [john.mccormick@schulich.uwo.ca](mailto:john.mccormick@schulich.uwo.ca))

Confidential

## Abstract

**Introduction:** *Staphylococcus aureus* bacteremia (SAB) is a persistent and challenging disease, with few recent studies assessing its scope and burden in a Canadian population. We evaluated the magnitude of SAB in a large cohort of patients, and identified risk factors associated with increased mortality.

**Methods:** We retrospectively reviewed adult (>18 years old) patients admitted with SAB between 2008 and 2012 at a regional tertiary-care centre in Southwestern Ontario. Hospital records were used to identify comorbidities, complications of SAB such as sepsis and need for mechanical ventilation (MV), and mortality. Multivariable logistic regression was performed to determine predictors of overall, in-hospital, and post-discharge mortality.

**Results:** We identified 1114 patients in our study. The proportion of methicillin-resistant *S. aureus* (MRSA) strains rose significantly during the study period ( $p=0.045$ ), while in-hospital mortality declined significantly (29% in 2008 to 11% in 2012,  $p<0.0001$ ). Age, MRSA, sepsis, admission to the intensive care unit, hepatic failure, prolonged (> 21 days) MV, chronic obstructive pulmonary disease (COPD), and malignancy (primary and metastatic) were associated with overall mortality and— with the exception of COPD and primary malignancy— in-hospital mortality. In contrast, peripheral vascular and cerebrovascular disease, COPD, diabetes, and malignancy (solid and hematogenous) were associated with increased post-discharge mortality.

**Interpretation:** This study features one of the largest retrospective cohort studies of SAB in Canada, and identifies key factors associated with in-hospital and post-discharge mortality.

1  
2  
3  
4  
5  
6  
7  
8  
9  
10  
11  
12  
13  
14  
15  
16  
17  
18  
19  
20  
21  
22  
23  
24  
25  
26  
27  
28  
29  
30  
31  
32  
33  
34  
35  
36  
37  
38  
39  
40  
41  
42  
43  
44  
45  
46  
47  
48  
49  
50  
51  
52  
53  
54  
55  
56  
57  
58  
59  
60

Identification of these predictors may guide empiric therapy and provide prognostic clarity for patients with SAB during and after their hospital admission.

**Keywords:** *Staphylococcus aureus*, bacteremia, MRSA, health outcomes research

Confidential

## Introduction

*Staphylococcus aureus* is a versatile and virulent pathogen with the ability to cause a multitude of life-threatening illnesses, including necrotizing soft-tissue infections,<sup>1</sup> infective endocarditis (IE)<sup>2,3</sup> and sepsis.<sup>4</sup> *S. aureus* is also one of the leading causes of healthcare-associated and hospital-acquired infections,<sup>1,5,6</sup> and the rates of infections are increasing steadily, particularly in North America and Europe.<sup>5-8</sup>

*S. aureus* bacteremia (SAB) is particularly associated with significant morbidity and mortality,<sup>9</sup> and demands rigorous management in order to prevent further infectious complications such as IE,<sup>2,3</sup> vertebral osteomyelitis,<sup>10</sup> embolic stroke,<sup>9</sup> recurrent infection, and metastatic disease. Despite the availability of treatment guidelines,<sup>11,12</sup> and scoring systems to estimate the likelihood of developing complications,<sup>9</sup> mortality from SAB remains approximately 20%.<sup>1,9,12</sup> Many studies from the previous decade<sup>6,8,13-16</sup> have also demonstrated the increasing prevalence of methicillin-resistant *S. aureus* (MRSA) strains within the community and in the hospital, leading to changes in the empiric treatment of SAB.<sup>11</sup> The objectives of our current retrospective cohort study, therefore, were to describe the contemporary scope of SAB and its complications, and to elucidate the risk factors associated with increased overall, in-hospital, and post-discharge mortality.

## Methods

### *Setting*

The present study was approved by the Western University Research Ethics Board (London, Ontario, Canada) and the Lawson Health Research Institute (approval number R-13-350). This study was conducted at the London Health Sciences Centre (LHSC), a tertiary-care

1  
2  
3 hospital system with two academic hospitals in Southwestern Ontario that serve a metropolitan  
4 population of approximately 435,000.<sup>17</sup> In addition to serving the local population, LHSC also  
5  
6 receives referrals from 33 rural hospitals in 7 counties, covering a catchment area that spans  
7  
8  
9  
10 21,000 square kilometres and a population of 2 million.<sup>17</sup>  
11

### 12 13 ***Patients***

14  
15  
16 All adult patients who developed *S. aureus* bacteremia between January 1, 2008 and  
17  
18 December 31, 2012 were initially included in the study. Reasons for excluding patients from the  
19  
20 study are indicated in Figure 1 and included polymicrobial infection (blood culture result  
21  
22 positive for more than 1 pathogen), age younger than 18 years, death prior to the return of a  
23  
24 positive culture result (to avoid confounding the analysis for mortality), patients who were not  
25  
26 admitted or left against medical advice, and incomplete hospital records.  
27  
28  
29  
30

### 31 ***Definitions***

32  
33 SAB was defined as occurring in a patient with at least one blood culture positive for *S.*  
34  
35 *aureus*. Comorbidity was defined as a disease or therapy that could predispose patients to  
36  
37 infection, alter defense mechanisms, or cause functional impairment, such as the following:  
38  
39 coronary artery disease; severe cardiac disease with symptomatic heart failure; peripheral  
40  
41 vascular disease; cerebrovascular disease; dementia; severe chronic obstructive pulmonary  
42  
43 disease (COPD); connective tissue disease; peptic ulcer disease; liver disease; diabetes; renal  
44  
45 disease; active neoplastic disease; and HIV infection.  
46  
47  
48  
49

50  
51 Patients with complicated SAB infections had a site of infection remote from the primary  
52  
53 focus caused by hematogenous seeding (e.g. endocarditis or vertebral osteomyelitis) or extension  
54  
55 of infection beyond the primary focus (e.g. septic thrombophlebitis or abscess). All cases of  
56  
57  
58  
59  
60



1  
2  
3 complicated infection were independently defined by radiologic imaging, culture of *S. aureus*  
4 from an otherwise normally sterile site, or the use of validated diagnostic criteria.<sup>9,11,12</sup> Septic  
5 shock, soft tissue source, and intravascular catheter source were defined according to standard  
6 methods.<sup>12,18,19</sup> Patients with uncomplicated SAB exhibited no evidence of complicated or  
7 recurrent SAB infection, which was defined as a positive culture result obtained from the same  
8 case within twelve weeks from the initial culture.  
9

10  
11  
12  
13  
14  
15  
16  
17  
18  
19 Operative intervention was defined as a procedure requiring general anaesthesia, and/or  
20 performed by a surgeon or interventional radiologist in the operating room or angiography suite.  
21  
22  
23 Bedside procedures such as upper and lower endoscopy, percutaneous tracheostomy, and abscess  
24 drains were not considered operations for this study.  
25  
26  
27

### 28 ***Study design and outcomes***

29  
30  
31 This was a retrospective cohort study. Our primary outcome was overall mortality which  
32 was identified from the patient record. Secondary outcomes included attributable in-hospital  
33 mortality,<sup>9</sup> defined as patients who died with persistent signs or symptoms of systemic infection,  
34 positive blood culture results, or a persistent focus of infection in the absence of another  
35 explanation for death during their hospital admission for SAB, requirement for prolonged (>21  
36 days) mechanical ventilation, length of hospital stay, development of complicated SAB  
37 infections, and post-discharge mortality.  
38  
39  
40  
41  
42  
43  
44  
45  
46  
47

### 48 ***Statistical analysis***

49  
50  
51 Descriptive statistics of patient variables were calculated for all patients with SAB.  
52  
53  
54 Continuous data were expressed as median (interquartile range; IQR; 25-75 percentile), and  
55  
56  
57  
58  
59  
60  
61  
62  
63  
64  
65  
66  
67  
68  
69  
70  
71  
72  
73  
74  
75  
76  
77  
78  
79  
80  
81  
82  
83  
84  
85  
86  
87  
88  
89  
90  
91  
92  
93  
94  
95  
96  
97  
98  
99  
100  
101  
102  
103  
104  
105  
106  
107  
108  
109  
110  
111  
112  
113  
114  
115  
116  
117  
118  
119  
120  
121  
122  
123  
124  
125  
126  
127  
128  
129  
130  
131  
132  
133  
134  
135  
136  
137  
138  
139  
140  
141  
142  
143  
144  
145  
146  
147  
148  
149  
150  
151  
152  
153  
154  
155  
156  
157  
158  
159  
160  
161  
162  
163  
164  
165  
166  
167  
168  
169  
170  
171  
172  
173  
174  
175  
176  
177  
178  
179  
180  
181  
182  
183  
184  
185  
186  
187  
188  
189  
190  
191  
192  
193  
194  
195  
196  
197  
198  
199  
200  
201  
202  
203  
204  
205  
206  
207  
208  
209  
210  
211  
212  
213  
214  
215  
216  
217  
218  
219  
220  
221  
222  
223  
224  
225  
226  
227  
228  
229  
230  
231  
232  
233  
234  
235  
236  
237  
238  
239  
240  
241  
242  
243  
244  
245  
246  
247  
248  
249  
250  
251  
252  
253  
254  
255  
256  
257  
258  
259  
260  
261  
262  
263  
264  
265  
266  
267  
268  
269  
270  
271  
272  
273  
274  
275  
276  
277  
278  
279  
280  
281  
282  
283  
284  
285  
286  
287  
288  
289  
290  
291  
292  
293  
294  
295  
296  
297  
298  
299  
300  
301  
302  
303  
304  
305  
306  
307  
308  
309  
310  
311  
312  
313  
314  
315  
316  
317  
318  
319  
320  
321  
322  
323  
324  
325  
326  
327  
328  
329  
330  
331  
332  
333  
334  
335  
336  
337  
338  
339  
340  
341  
342  
343  
344  
345  
346  
347  
348  
349  
350  
351  
352  
353  
354  
355  
356  
357  
358  
359  
360  
361  
362  
363  
364  
365  
366  
367  
368  
369  
370  
371  
372  
373  
374  
375  
376  
377  
378  
379  
380  
381  
382  
383  
384  
385  
386  
387  
388  
389  
390  
391  
392  
393  
394  
395  
396  
397  
398  
399  
400  
401  
402  
403  
404  
405  
406  
407  
408  
409  
410  
411  
412  
413  
414  
415  
416  
417  
418  
419  
420  
421  
422  
423  
424  
425  
426  
427  
428  
429  
430  
431  
432  
433  
434  
435  
436  
437  
438  
439  
440  
441  
442  
443  
444  
445  
446  
447  
448  
449  
450  
451  
452  
453  
454  
455  
456  
457  
458  
459  
460  
461  
462  
463  
464  
465  
466  
467  
468  
469  
470  
471  
472  
473  
474  
475  
476  
477  
478  
479  
480  
481  
482  
483  
484  
485  
486  
487  
488  
489  
490  
491  
492  
493  
494  
495  
496  
497  
498  
499  
500  
501  
502  
503  
504  
505  
506  
507  
508  
509  
510  
511  
512  
513  
514  
515  
516  
517  
518  
519  
520  
521  
522  
523  
524  
525  
526  
527  
528  
529  
530  
531  
532  
533  
534  
535  
536  
537  
538  
539  
540  
541  
542  
543  
544  
545  
546  
547  
548  
549  
550  
551  
552  
553  
554  
555  
556  
557  
558  
559  
560  
561  
562  
563  
564  
565  
566  
567  
568  
569  
570  
571  
572  
573  
574  
575  
576  
577  
578  
579  
580  
581  
582  
583  
584  
585  
586  
587  
588  
589  
590  
591  
592  
593  
594  
595  
596  
597  
598  
599  
600  
601  
602  
603  
604  
605  
606  
607  
608  
609  
610  
611  
612  
613  
614  
615  
616  
617  
618  
619  
620  
621  
622  
623  
624  
625  
626  
627  
628  
629  
630  
631  
632  
633  
634  
635  
636  
637  
638  
639  
640  
641  
642  
643  
644  
645  
646  
647  
648  
649  
650  
651  
652  
653  
654  
655  
656  
657  
658  
659  
660  
661  
662  
663  
664  
665  
666  
667  
668  
669  
670  
671  
672  
673  
674  
675  
676  
677  
678  
679  
680  
681  
682  
683  
684  
685  
686  
687  
688  
689  
690  
691  
692  
693  
694  
695  
696  
697  
698  
699  
700  
701  
702  
703  
704  
705  
706  
707  
708  
709  
710  
711  
712  
713  
714  
715  
716  
717  
718  
719  
720  
721  
722  
723  
724  
725  
726  
727  
728  
729  
730  
731  
732  
733  
734  
735  
736  
737  
738  
739  
740  
741  
742  
743  
744  
745  
746  
747  
748  
749  
750  
751  
752  
753  
754  
755  
756  
757  
758  
759  
760  
761  
762  
763  
764  
765  
766  
767  
768  
769  
770  
771  
772  
773  
774  
775  
776  
777  
778  
779  
780  
781  
782  
783  
784  
785  
786  
787  
788  
789  
790  
791  
792  
793  
794  
795  
796  
797  
798  
799  
800  
801  
802  
803  
804  
805  
806  
807  
808  
809  
810  
811  
812  
813  
814  
815  
816  
817  
818  
819  
820  
821  
822  
823  
824  
825  
826  
827  
828  
829  
830  
831  
832  
833  
834  
835  
836  
837  
838  
839  
840  
841  
842  
843  
844  
845  
846  
847  
848  
849  
850  
851  
852  
853  
854  
855  
856  
857  
858  
859  
860  
861  
862  
863  
864  
865  
866  
867  
868  
869  
870  
871  
872  
873  
874  
875  
876  
877  
878  
879  
880  
881  
882  
883  
884  
885  
886  
887  
888  
889  
890  
891  
892  
893  
894  
895  
896  
897  
898  
899  
900  
901  
902  
903  
904  
905  
906  
907  
908  
909  
910  
911  
912  
913  
914  
915  
916  
917  
918  
919  
920  
921  
922  
923  
924  
925  
926  
927  
928  
929  
930  
931  
932  
933  
934  
935  
936  
937  
938  
939  
940  
941  
942  
943  
944  
945  
946  
947  
948  
949  
950  
951  
952  
953  
954  
955  
956  
957  
958  
959  
960  
961  
962  
963  
964  
965  
966  
967  
968  
969  
970  
971  
972  
973  
974  
975  
976  
977  
978  
979  
980  
981  
982  
983  
984  
985  
986  
987  
988  
989  
990  
991  
992  
993  
994  
995  
996  
997  
998  
999  
1000

1  
2  
3 methicillin-resistant *S. aureus* (MRSA) infections, proportion of intravenous drug users, and in-  
4  
5 hospital mortality was assessed with the Cochran-Armitage chi-square test for trend.  
6  
7

8  
9 Univariable logistic regression was used to evaluate the association between mortality  
10  
11 (overall, in-hospital, and post-discharge) and each individual patient characteristic or clinical  
12  
13 factor. Clinically-relevant variables (based on published studies<sup>18,20-23</sup>), as well as variables  
14  
15 showing a significant association ( $p < 0.1$ ) with overall mortality, in-hospital mortality, or post-  
16  
17 discharge mortality, were included in three multivariable logistic regression models obtained  
18  
19 using stepwise regression. The significance levels for variables entering into and remaining in  
20  
21 the models were set at 0.05 and 0.10 respectively. For recurrent cases of SAB, only the first  
22  
23 admission was used in the univariable and multivariable analyses. Odds ratios (ORs) and Wald  
24  
25 95% confidence intervals (CIs) were computed. Calibration of each multivariable model was  
26  
27 assessed using the Hosmer-Lemeshow goodness-of-fit test<sup>24</sup> to evaluate whether significant  
28  
29 discrepancies existed between the observed and expected mortality. All tests were two-tailed,  
30  
31 and a p value of less than 0.05 was considered to be statistically significant. Statistical analysis  
32  
33 was performed using SAS, Version 9.3 (SAS Institute, Inc., Cary, NC).  
34  
35  
36  
37  
38  
39  
40  
41

## 42 **Results**

43  
44 We identified 1114 patients who met our inclusion criteria and were admitted to LHSC  
45  
46 for SAB during the study period (Figure 1); their demographics are presented in Table 1. Sixty-  
47  
48 three percent of patients were male and 19% were intravenous drug users (IVDU). The overall  
49  
50 incidence of MRSA was 43% in our study, while the incidence of sepsis was 70%. In our study,  
51  
52 126 patients (11%) had pneumonia, while 20% had a soft-tissue infection, and a further 6.9% had  
53  
54 an intravascular catheter as a source of their infection.  
55  
56  
57  
58  
59  
60

1  
2  
3 In this study, 499 patients (45%) developed a complicated SAB infection (Table 2).  
4  
5 Amongst all cases, 205 patients (18%) developed recurrent invasive infections, and 122 patients  
6  
7 (11%) were diagnosed with IE. A smaller proportion of patients developed vertebral  
8  
9 osteomyelitis (2.2%), deep tissue infections (5%), epidural and psoas abscesses (2% and 1.1%  
10  
11 respectively), and embolic strokes (0.72%). Complications sustained during the course of the  
12  
13 hospital stay included renal failure requiring dialysis (9.5%), prolonged mechanical ventilation  
14  
15 lasting more than 21 days (5.6%) and hepatic failure (2.2%). A further 39 patients (3.5%)  
16  
17 developed *C. difficile* enterocolitis or ischemic colitis. A total of 263 patients (24%) were  
18  
19 admitted to the intensive care unit during their admission, while 251 (23%) patients died in-  
20  
21 hospital; a further 212 (19%) patients died post-discharge. Among the latter group, 60 patients  
22  
23 (28% of post-discharge mortalities) died within 90 days of discharge.  
24  
25  
26  
27  
28  
29

30 We examined the trends in proportions of MRSA, IVDUs, and in-hospital mortality  
31  
32 throughout the study period. The proportion of MRSA strains isolated from SAB patients  
33  
34 increased significantly from 40% in 2008 to 51% in 2012 (Figure 2;  $p= 0.045$ ). The proportion of  
35  
36 IVDUs in our study population also rose significantly during the study period (14% in 2008 to  
37  
38 22% of patients in 2012,  $p= 0.0034$ ). In-hospital mortality, however, declined significantly from  
39  
40 29% in 2008 to 11% in 2012 ( $p< 0.0001$ ; Figure 2).  
41  
42  
43  
44

45 When we performed multivariable logistic regression analyses on overall mortality  
46  
47 (Table 3), age (in decades), methicillin resistance, diagnosis of sepsis, admission to the ICU,  
48  
49 development of hepatic failure, requirement for prolonged mechanical ventilation, COPD,  
50  
51 presence of solid malignancy or leukemia, and metastatic cancer, were all independently  
52  
53 associated with increased mortality. Operative intervention was associated with a reduced risk of  
54  
55 overall mortality. These factors, with the exception of COPD and the presence of solid  
56  
57  
58  
59  
60

1  
2  
3 malignancy or leukemia, were also independently associated with increased in-hospital mortality  
4  
5 (Table 4). The presence of skin and soft tissue infection as a source of SAB was associated with  
6  
7 reduced in-hospital mortality. The clinical variables independently associated with increased  
8  
9 post-discharge mortality (Table 4) were the presence of peripheral vascular and cerebrovascular  
10  
11 disease, COPD, diabetes, and primary solid or hematogenous malignancy. As with overall  
12  
13 mortality, operative intervention was independently associated with a reduced risk of post-  
14  
15 discharge mortality.  
16  
17  
18  
19  
20

## 21 Interpretation

22  
23  
24 Information about the magnitude and burden of SAB, as well as associated risk factors  
25  
26 for mortality, is critical for the management of this disease. Our study features one of the largest  
27  
28 retrospective cohort studies of SAB in Canada, wherein we describe the incidence and  
29  
30 distribution of SAB and its complications, and identify predictors of overall, in-hospital, and  
31  
32 post-discharge mortality.  
33  
34  
35  
36

37  
38 Although the overall mortality rate in our cohort was 23%, the in-hospital mortality rate  
39  
40 declined significantly during the study period. This observation may be explained by two  
41  
42 priorities that were initiated at our institution in 2008 to reduce *S. aureus* infections: the  
43  
44 implementation of infection control strategies to specifically prevent the spread of *S. aureus*; and  
45  
46 the development of algorithms to rapidly identify and treat patients with severe infections.<sup>25</sup> The  
47  
48 adoption of similar measures is also felt to have contributed to a comparable observation made  
49  
50 by Benfield *et al* in a Danish study,<sup>26</sup> where case-mortality associated with hospital- and  
51  
52 community-acquired SAB declined by 43% and 23% respectively over a 19-year period.  
53  
54  
55  
56  
57  
58  
59  
60

1  
2  
3  
4  
5  
6  
7  
8  
9  
10  
11  
12  
13  
14  
15  
16  
17  
18  
19  
20  
21  
22  
23  
24  
25  
26  
27  
28  
29  
30  
31  
32  
33  
34  
35  
36

Factors that were previously shown to be predictive of in-hospital mortality correlated with the variables identified in our study, including age,<sup>27</sup> sepsis,<sup>27,28</sup> methicillin resistance,<sup>14,29</sup> ICU admission,<sup>30</sup> hepatic failure,<sup>27</sup> mechanical ventilation,<sup>31</sup> COPD, and primary and metastatic malignancy (both solid and haematological).<sup>31,32</sup> The large sample size allowed us to investigate the association between specific patient characteristics and outcomes, rather than aggregating comorbidities using scales such as the Charlson Comorbidity Index. An additional novelty of this study is the identification of risk factors associated with post-discharge mortality, given that an increasing number of patients with SAB are surviving beyond the length of their hospital stay.<sup>33-</sup>  
<sup>35</sup> Our finding that peripheral vascular and cerebrovascular disease, COPD, diabetes, and primary malignancy increased the risk of post-discharge mortality (but not in-hospital mortality) demonstrates that not all concurrent comorbidities are alike in effect. Furthermore, a significant majority of post-discharge mortalities occurred beyond 90 days after leaving the hospital, suggesting that patients sustain long-term adverse consequences from SAB long after they are treated for their acute episode.<sup>33</sup>

37  
38  
39  
40  
41  
42  
43  
44  
45  
46  
47  
48  
49  
50  
51  
52  
53  
54  
55  
56  
57  
58  
59  
60

Our study also extends the findings of a Canadian population-based analysis in 2007 by Laupland and colleagues, who observed MRSA bacteremia in 11% of bacteremic *S. aureus* infections.<sup>8</sup> The proportion of methicillin resistance among SAB isolates is significantly higher in our study, but is comparable to several American studies.<sup>2,13,36-38</sup> Klevens *et al* reported that MRSA strains accounted for 64% of hospital-acquired *S. aureus* infections isolated from intensive care units,<sup>5</sup> while Styers *et al*<sup>15</sup> observed that between 47.9% and 59.2% of hospital-acquired *S. aureus* isolates demonstrated methicillin resistance. Despite the implementation of infection control strategies and empiric treatment coverage for MRSA, the incidence of MRSA among SAB patients continued to rise significantly in our study, mimicking the trend seen in

1  
2  
3 many North American and European centres.<sup>6,8,26,39</sup> Additionally, methicillin resistance was  
4  
5 found to be a significant predictor of mortality in our study, corroborating observations by  
6  
7 Cosgrove *et al*<sup>14</sup> and Blot *et al*.<sup>29</sup> Interestingly, a large retrospective cohort study at an American  
8  
9 centre<sup>27</sup> showed that methicillin resistance was not associated with increased risk of death,  
10  
11 suggesting that genetic variations between MRSA strains in different geographic regions<sup>16</sup> can  
12  
13 affect disease severity and alter outcomes. Nevertheless, our observations affirm the need for  
14  
15 increased awareness and rigorous treatment of MRSA infections,<sup>8,13,31</sup> as well as continued  
16  
17 vigilance in screening and identifying patients colonized with MRSA.<sup>6,40</sup>  
18  
19  
20  
21  
22

23 The male preponderance and older age of our study population supports previous  
24  
25 observations that males and elderly individuals are at increased risk for developing SAB.<sup>8</sup>  
26  
27 However, the patient-specific comorbidities associated with mortality in our study (peripheral  
28  
29 and cerebrovascular disease, COPD, malignancy, and diabetes) are different from the risk factors  
30  
31 associated with the acquisition of SAB (diabetes, heart disease, cancer, need for dialysis, and  
32  
33 hepatitis C) as identified by Laupland *et al*,<sup>8</sup> suggesting that the interaction between patient-  
34  
35 specific factors and pathogen virulence plays a critical role in determining eventual outcome,  
36  
37 rather than patient comorbidities alone.  
38  
39  
40  
41  
42

43 This study also highlights the impact of SAB and its complications on healthcare  
44  
45 resource utilization. Our rate of complicated SAB (45%) is similar to a prospective study by  
46  
47 Fowler *et al*,<sup>9</sup> in which 43% of 724 patients with SAB were found to have developed a  
48  
49 complicated SAB infection during a twelve-week period. In our study, a significant proportion of  
50  
51 patients required admission to the ICU, while a smaller number required prolonged mechanical  
52  
53 ventilation or dialysis for renal failure. These complications, in addition to the infectious  
54  
55 consequences of SAB such as IE and osteomyelitis, significantly increase the morbidity of  
56  
57  
58  
59  
60

1  
2  
3 SAB,<sup>1,11,12</sup> prolong hospital stay,<sup>41</sup> and reduce survival.<sup>9,11,12</sup> The results of our study, therefore,  
4  
5 may prompt a closer examination of treatment strategies for SAB, in order to optimize outcomes.  
6  
7

8  
9 Although this study benefits from its large size, it is limited by its retrospective design  
10 and single-center setting. Additionally, we may have underestimated the incidence of SAB  
11 disease if patients in the region sought health care from other facilities. We were also unable to  
12 assess the duration and adequacy of antibiotic therapy for all study patients, limiting our ability  
13 to control for these confounders by multivariable analysis. While complications of SAB can be  
14 difficult to identify at the time of the initial positive result of blood culture and may be prone to  
15 selection bias, our review of the medical records throughout patients' hospital stay is likely to  
16 have helped to reduce the bias, and improve the identification of complications. Selection bias is  
17 also likely to have contributed to our finding that operative intervention was associated with  
18 reduced overall and post-discharge mortality, given that patients selected for surgery may be  
19 healthier than their non-surgical counterparts. Therefore, further stratification and analysis of the  
20 subgroup undergoing surgical intervention, and comparison with a matched non-surgical cohort,  
21 is necessary to better understand the effect of surgery on survival in SAB.  
22  
23  
24  
25  
26  
27  
28  
29  
30  
31  
32  
33  
34  
35  
36  
37  
38  
39

40 In conclusion, we present one of the largest retrospective cohort studies of SAB in  
41 Canada, and highlight the significant clinical impact of an important and pervasive disease. In  
42 addition to describing the incidence and burden of SAB in a Canadian population, we have also  
43 identified important risk factors associated with overall, in-hospital, and post-discharge  
44 mortality. The results of our study may help in the inpatient management of SAB, provide  
45 prognostic clarity for affected patients, and aid in the follow-up of at-risk patient populations  
46 after their hospital stay.  
47  
48  
49  
50  
51  
52  
53  
54  
55  
56  
57  
58  
59  
60

## Disclosure

The authors do not have any actual or potential conflicts of interest to declare.

## Author Contributions

Ram Anantha was responsible for the study design, data collection, statistical analysis and interpretation, drafting of the manuscript, and assisting with obtainment of funding. Januvi Jegatheswaran and Daniel Pepe collected the data. Fran Priestap performed the statistical analysis and contributed to the drafting of the initial manuscript. Johan Delpont and Mansour Haeryfar contributed to the study design and interpretation of the data. John McCormick and Tina Mele obtained funding, and supervised all aspects of the study. All of the authors revised the manuscript for critical and important intellectual content, and approved the final version to be published.

## Acknowledgements

Ram Anantha is supported by the Clinical-Investigator Program (Royal College of Physicians and Surgeons of Canada), an Ontario Graduate Scholarship (Ontario Ministry of Education), and a Canadian Institutes of Health Research (CIHR) Canada Graduate Scholarship. This study was supported by grants from CIHR to John McCormick (MOP 64176) and Mansour Haeryfar (MOP 130465). Mansour Haeryfar holds a Canada Research Chair in Viral Immunity & Pathogenesis. Tina Mele is also supported by the Department of Surgery (Western University) and the Lawson Health Research Institute (London, Ontario).



## References

1. Lowy FD. Staphylococcus aureus infections. *N Engl J Med*. 1998;339:520-32.
2. Fowler VG, Jr., Miro JM, Hoen B, et al. Staphylococcus aureus endocarditis: a consequence of medical progress. *JAMA*. 2005;293:3012-21.
3. Miro JM, Anguera I, Cabell CH, et al. Staphylococcus aureus native valve infective endocarditis: report of 566 episodes from the International Collaboration on Endocarditis Merged Database. *Clin Infect Dis*. 2005;41:507-14.
4. Diekema DJ, Pfaller MA, Schmitz FJ, et al. Survey of infections due to Staphylococcus species: frequency of occurrence and antimicrobial susceptibility of isolates collected in the United States, Canada, Latin America, Europe, and the Western Pacific region for the SENTRY Antimicrobial Surveillance Program, 1997-1999. *Clinical infectious diseases : an official publication of the Infectious Diseases Society of America*. 2001;32 Suppl 2:S114-32.
5. Klevens RM, Edwards JR, Tenover FC, et al. Changes in the epidemiology of methicillin-resistant Staphylococcus aureus in intensive care units in US hospitals, 1992-2003. *Clin Infect Dis*. 2006;42:389-91.
6. Simor AE, Ofner-Agostini M, Bryce E, et al. The evolution of methicillin-resistant Staphylococcus aureus in Canadian hospitals: 5 years of national surveillance. *CMAJ : Canadian Medical Association journal = journal de l'Association medicale canadienne*. 2001;165:21-6.
7. Tadros M, Williams V, Coleman BL, et al. Epidemiology and Outcome of Pneumonia Caused by Methicillin-Resistant Staphylococcus aureus (MRSA) in Canadian Hospitals. *PLoS One*. 2013;8:e75171.
8. Laupland KB, Ross T, Gregson DB. Staphylococcus aureus bloodstream infections: risk factors, outcomes, and the influence of methicillin resistance in Calgary, Canada, 2000-2006. *The Journal of infectious diseases*. 2008;198:336-43.
9. Fowler VG, Jr., Olsen MK, Corey GR, et al. Clinical identifiers of complicated Staphylococcus aureus bacteremia. *Arch Intern Med*. 2003;163:2066-72.
10. Park KH, Chong YP, Kim SH, et al. Clinical characteristics and therapeutic outcomes of hematogenous vertebral osteomyelitis caused by methicillin-resistant Staphylococcus aureus. *J Infect*. 2013.
11. Corey GR. Staphylococcus aureus bloodstream infections: definitions and treatment. *Clin Infect Dis*. 2009;48 Suppl 4:S254-9.
12. Mitchell DH, Howden BP. Diagnosis and management of Staphylococcus aureus bacteraemia. *Intern Med J*. 2005;35 Suppl 2:S17-24.
13. Kuehnert MJ, Hill HA, Kupronis BA, Tokars JI, Solomon SL, Jernigan DB. Methicillin-resistant-Staphylococcus aureus hospitalizations, United States. *Emerging infectious diseases*. 2005;11:868-72.
14. Cosgrove SE, Sakoulas G, Perencevich EN, Schwaber MJ, Karchmer AW, Carmeli Y. Comparison of mortality associated with methicillin-resistant and methicillin-susceptible Staphylococcus aureus bacteremia: a meta-analysis. *Clin Infect Dis*. 2003;36:53-9.
15. Styers D, Sheehan DJ, Hogan P, Sahm DF. Laboratory-based surveillance of current antimicrobial resistance patterns and trends among Staphylococcus aureus: 2005 status in the United States. *Ann Clin Microbiol Antimicrob*. 2006;5:2.

16. Simor AE, Ofner-Agostini M, Bryce E, et al. Laboratory characterization of methicillin-resistant *Staphylococcus aureus* in Canadian hospitals: results of 5 years of National Surveillance, 1995-1999. *The Journal of infectious diseases*. 2002;186:652-60.
17. Statistics Canada. Census Profile - Population Centre. 2011; <http://www12.statcan.gc.ca/census-recensement/2011/dp-pd/prof/details/page.cfm?Lang=E&Geo1=POPC&Code1=0480&Geo2=PR&Code2=35&Data=Count&SearchText=London&SearchType=Begins&SearchPR=01&B1=All&Custom=&TABID=1>. Accessed January 29, 2014.
18. Conterno LO, Wey SB, Castelo A. Risk factors for mortality in *Staphylococcus aureus* bacteremia. *Infect Control Hosp Epidemiol*. 1998;19:32-7.
19. Levy MM, Fink MP, Marshall JC, et al. 2001 SCCM/ESICM/ACCP/ATS/SIS International Sepsis Definitions Conference. *Crit Care Med*. 2003;31:1250-6.
20. Mylotte JM, Aeschlimann JR, Rotella DL. *Staphylococcus aureus* bacteremia: factors predicting hospital mortality. *Infect Control Hosp Epidemiol*. 1996;17:165-8.
21. Mylotte JM, Tayara A. *Staphylococcus aureus* bacteremia: predictors of 30-day mortality in a large cohort. *Clin Infect Dis*. 2000;31:1170-4.
22. Schonheyder HC, Gottschau A, Friland A, Rosdahl VT. Mortality rate and magnitude of *Staphylococcus aureus* bacteremia as assessed by a semiquantitative blood culture system. *Scand J Infect Dis*. 1995;27:19-21.
23. Jensen AG, Wachmann CH, Espersen F, Scheibel J, Skinhoj P, Frimodt-Moller N. Treatment and outcome of *Staphylococcus aureus* bacteremia: a prospective study of 278 cases. *Arch Intern Med*. 2002;162:25-32.
24. Hosmer DW, Lemeshow, S., and Sturdivant, Rodney X. *Applied Logistic Regression*. 2nd ed: Wiley; 2004.
25. Dellinger RP, Carlet JM, Masur H, et al. Surviving Sepsis Campaign guidelines for management of severe sepsis and septic shock. *Critical care medicine*. 2004;32:858-73.
26. Benfield T, Espersen F, Frimodt-Moller N, et al. Increasing incidence but decreasing in-hospital mortality of adult *Staphylococcus aureus* bacteraemia between 1981 and 2000. *Clinical microbiology and infection : the official publication of the European Society of Clinical Microbiology and Infectious Diseases*. 2007;13:257-63.
27. Pastagia M, Kleinman LC, Lacerda de la Cruz EG, Jenkins SG. Predicting risk for death from MRSA bacteremia. *Emerging infectious diseases*. 2012;18:1072-80.
28. Kang CI, Song JH, Chung DR, et al. Bloodstream infections in adult patients with cancer: clinical features and pathogenic significance of *Staphylococcus aureus* bacteremia. *Supportive care in cancer : official journal of the Multinational Association of Supportive Care in Cancer*. 2012;20:2371-8.
29. Blot SI, Vandewoude KH, Hoste EA, Colardyn FA. Outcome and attributable mortality in critically ill patients with bacteremia involving methicillin-susceptible and methicillin-resistant *Staphylococcus aureus*. *Arch Intern Med*. 2002;162:2229-35.
30. Castillo JS, Leal AL, Cortes JA, et al. Mortality among critically ill patients with methicillin-resistant *Staphylococcus aureus* bacteremia: a multicenter cohort study in Colombia. *Revista panamericana de salud publica = Pan American journal of public health*. 2012;32:343-50.
31. Wang FD, Chen YY, Chen TL, Liu CY. Risk factors and mortality in patients with nosocomial *Staphylococcus aureus* bacteremia. *American journal of infection control*. 2008;36:118-22.

- 1
  - 2
  - 3
  - 4
  - 5
  - 6
  - 7
  - 8
  - 9
  - 10
  - 11
  - 12
  - 13
  - 14
  - 15
  - 16
  - 17
  - 18
  - 19
  - 20
  - 21
  - 22
  - 23
  - 24
  - 25
  - 26
  - 27
  - 28
  - 29
  - 30
  - 31
  - 32
  - 33
  - 34
  - 35
  - 36
  - 37
  - 38
  - 39
  - 40
  - 41
  - 42
  - 43
  - 44
  - 45
  - 46
  - 47
  - 48
  - 49
  - 50
  - 51
  - 52
  - 53
  - 54
  - 55
  - 56
  - 57
  - 58
  - 59
  - 60
32. Joo EJ, Peck KR, Ha YE, et al. Impact of acute kidney injury on mortality and medical costs in patients with methicillin-resistant *Staphylococcus aureus* bacteraemia: a retrospective, multicentre observational study. *The Journal of hospital infection*. 2013;83:300-6.
33. Fatkenheuer G, Preuss M, Salzberger B, et al. Long-term outcome and quality of care of patients with *Staphylococcus aureus* bacteremia. *Eur J Clin Microbiol Infect Dis*. 2004;23:157-62.
34. Wolkewitz M, Frank U, Philips G, Schumacher M, Davey P, Group BS. Mortality associated with in-hospital bacteraemia caused by *Staphylococcus aureus*: a multistate analysis with follow-up beyond hospital discharge. *J Antimicrob Chemother*. 2011;66:381-6.
35. Wang HE, Szychowski JM, Griffin R, Safford MM, Shapiro NI, Howard G. Long-term mortality after community-acquired sepsis: a longitudinal population-based cohort study. *BMJ open*. 2014;4:e004283.
36. Strausbaugh LJ, Crossley KB, Nurse BA, Thrupp LD. Antimicrobial resistance in long-term-care facilities. *Infect Control Hosp Epidemiol*. 1996;17:129-40.
37. Klein E, Smith DL, Laxminarayan R. Hospitalizations and deaths caused by methicillin-resistant *Staphylococcus aureus*, United States, 1999-2005. *Emerging infectious diseases*. 2007;13:1840-6.
38. Federspiel JJ, Stearns SC, Peppercorn AF, Chu VH, Fowler VG, Jr. Increasing US rates of endocarditis with *Staphylococcus aureus*: 1999-2008. *Arch Intern Med*. 2012;172:363-5.
39. Frederiksen MS, Espersen F, Frimodt-Møller N, et al. Changing epidemiology of pediatric *Staphylococcus aureus* bacteremia in Denmark from 1971 through 2000. *Pediatr Infect Dis J*. 2007;26:398-405.
40. Loeb MB, Main C, Eady A, Walker-Dilks C. Antimicrobial drugs for treating methicillin-resistant *Staphylococcus aureus* colonization. *Cochrane Database Syst Rev*. 2003:CD003340.
41. Chang FY, MacDonald BB, Peacock JE, Jr., et al. A prospective multicenter study of *Staphylococcus aureus* bacteremia: incidence of endocarditis, risk factors for mortality, and clinical impact of methicillin resistance. *Medicine (Baltimore)*. 2003;82:322-32.

## Figure Legends

Figure 1: Patients included and excluded from the study

Figure 2: Number of quarterly admissions for patients with *Staphylococcus aureus* bacteremia

(SAB) between 2008 and 2012, and quarterly proportions of methicillin-resistant *S. aureus*

(MRSA), in-hospital mortality, and intravenous drug users as a percentage of SAB patients. \* $p <$

0.05, \*\* $p <$  0.01, \*\*\* $p <$  0.001 by Cochran-Armitage chi-square test for trend.

Confidential

Table 1: Characterization of 1114 patients with *Staphylococcus aureus* bacteremia

| Characteristic                               | Value       |
|----------------------------------------------|-------------|
| Age, y (range)                               | 64 (18-102) |
| Male gender, n (%)                           | 706 (63)    |
| Comorbidities, n (%):                        |             |
| HIV positive / AIDS                          | 32 (2.9)    |
| Injection drug use                           | 214 (19)    |
| Diabetes mellitus                            | 306 (27)    |
| Cardiac disease (CAD, CHF)                   | 278 (25)    |
| Peripheral vascular disease                  | 97 (8.7)    |
| Cerebrovascular Disease                      | 171 (15)    |
| Dementia                                     | 65 (5.8)    |
| COPD                                         | 104 (9.3)   |
| Liver disease:                               | 228 (20)    |
| Hepatitis B/C co-infection                   | 73 (6.5)    |
| Cirrhosis                                    | 36 (3.2)    |
| Pre-existing renal disease                   | 227 (20)    |
| Solid malignancy                             | 200 (18)    |
| Leukemia and lymphoma                        | 38 (3.4)    |
| Metastatic malignancy                        | 94 (8.4)    |
| Infection characteristics, n (%):            |             |
| MRSA                                         | 477 (43)    |
| Sepsis                                       | 775 (70)    |
| Dominant focus of infection, n (%):          |             |
| Central or peripheral intravascular catheter | 77 (6.9)    |
| Pneumonia                                    | 126 (11)    |
| Skin and soft tissue infection               | 219 (20)    |
| Other <sup>1</sup>                           | 10 (0.90)   |

<sup>1</sup> Includes foci that occur in less than 1% of cases each, such as central nervous system infection (3), lung abscess (3), urinary tract infection (4).

Table 2: Outcomes of 1114 patients with *Staphylococcus aureus* bacteremia

| Outcome                                              | Value     |
|------------------------------------------------------|-----------|
| Complicated <i>S. aureus</i> bacteremia, n (%):      |           |
| Recurrent infections:                                | 205 (18)  |
| One recurrence                                       | 177 (16)  |
| Two recurrences                                      | 14 (1.2)  |
| Three or more recurrences                            | 14 (1.2)  |
| Infective endocarditis                               | 122 (11)  |
| Septic arthritis                                     | 24 (2.2)  |
| Deep tissue abscess                                  | 56 (5.0)  |
| Osteomyelitis:                                       |           |
| Vertebral                                            | 25 (2.2)  |
| Non-vertebral (ie. hand or foot)                     | 6 (0.54)  |
| Epidural abscess                                     | 22 (2.0)  |
| Septic thrombophlebitis                              | 2 (0.18)  |
| Psoas abscess                                        | 12 (1.1)  |
| Meningitis                                           | 4 (0.36)  |
| Embolic stroke                                       | 8 (0.72)  |
| Other complications <sup>1</sup>                     | 13 (1.2)  |
| Complications during hospital stay, n (%):           |           |
| Operative intervention                               | 364 (33)  |
| Renal failure requiring dialysis                     | 106 (9.5) |
| Hepatic failure                                      | 25 (2.2)  |
| Prolonged ventilation (> 21 days)                    | 63 (5.6)  |
| <i>Clostridium difficile</i> infection               | 22 (2.0)  |
| Ischemic colitis                                     | 17 (1.5)  |
| Myocardial infarction                                | 10 (0.90) |
| Admission to intensive care unit (ICU), n (%)        | 263 (24)  |
| Length of stay in hospital, days (IQR <sup>2</sup> ) | 14 (7-28) |
| Mortality, n (%):                                    | 463 (42)  |
| In-hospital mortality                                | 251 (23)  |
| Mortality post-discharge:                            | 212 (19)  |
| 30-day                                               | 30 (2.7)  |
| 90-day                                               | 60 (5.4)  |

<sup>1</sup> Includes patients with mycotic aneurysm (7), empyema (4), and pericarditis (2)

<sup>2</sup> Interquartile range (25-75 percentile)

Table 3: Univariable and multivariable analysis of risk factors contributing to overall mortality

| Parameter                                | Univariable Analysis       |                   | Multivariable Analysis     |                   |
|------------------------------------------|----------------------------|-------------------|----------------------------|-------------------|
|                                          | OR (95% CI)                | P value           | OR (95% CI)                | P value           |
| <b>Age (decades)</b>                     | <b>1.40 (1.30 - 1.50)</b>  | <b>&lt;0.0001</b> | <b>1.40 (1.30 - 1.51)</b>  | <b>&lt;0.0001</b> |
| Male gender                              | 0.95 (0.74 - 1.21)         | 0.665             | -                          | -                 |
| Injection drug use                       | 0.36 (0.26 - 0.51)         | <0.0001           | -                          | NS <sup>1</sup>   |
| <b>Methicillin resistance</b>            | <b>1.35 (1.06 - 1.71)</b>  | <b>0.015</b>      | <b>1.33 (1.01 - 1.75)</b>  | <b>0.041</b>      |
| <b>Sepsis</b>                            | <b>1.68 (1.29 - 2.19)</b>  | <b>0.0001</b>     | <b>1.72 (1.27 - 2.33)</b>  | <b>0.0005</b>     |
| Pneumonia                                | 2.04 (1.40 - 2.96)         | 0.0002            | -                          | NS                |
| Skin/soft tissue infection               | 0.79 (0.58 - 1.07)         | 0.126             | -                          | -                 |
| <b>Admission to ICU</b>                  | <b>2.80 (2.09 - 3.74)</b>  | <b>&lt;0.0001</b> | <b>3.26 (2.28 - 4.67)</b>  | <b>&lt;0.0001</b> |
| Coronary artery disease                  | 1.76 (1.29 - 2.42)         | 0.0004            | -                          | NS                |
| Congestive heart failure                 | 1.84 (1.20 - 2.83)         | 0.005             | -                          | NS                |
| Peripheral vascular disease              | 1.42 (0.94 - 2.16)         | 0.099             | -                          | NS                |
| Acute kidney injury (dialysis-dependent) | 1.59 (1.06 - 2.37)         | 0.024             | -                          | NS                |
| <b>Hepatic failure</b>                   | <b>4.60 (1.82 - 11.61)</b> | <b>0.001</b>      | <b>4.62 (1.69 - 12.66)</b> | <b>0.003</b>      |
| <b>Prolonged ventilation &gt;21 d</b>    | <b>3.49 (2.01 - 6.07)</b>  | <b>&lt;0.0001</b> | <b>2.15 (1.12 - 4.11)</b>  | <b>0.021</b>      |
| <b>Operative intervention</b>            | <b>0.64 (0.48 - 0.84)</b>  | <b>0.001</b>      | <b>0.50 (0.36 - 0.69)</b>  | <b>&lt;0.0001</b> |
| Cerebrovascular disease                  | 1.90 (1.37 - 2.64)         | 0.0001            | -                          | NS                |
| Dementia                                 | 2.72 (1.61 - 4.60)         | 0.0002            | -                          | NS                |
| <b>COPD</b>                              | <b>2.68 (1.77 - 4.08)</b>  | <b>&lt;0.0001</b> | <b>1.96 (1.24 - 3.11)</b>  | <b>0.004</b>      |
| Connective tissue disease                | 1.04 (0.52 - 2.09)         | 0.919             | -                          | -                 |
| Peptic ulcer disease                     | 1.17 (0.63 - 2.17)         | 0.623             | -                          | -                 |
| Liver disease                            | 0.60 (0.44 - 0.82)         | 0.001             | -                          | NS                |
| Hepatitis C infection                    | 0.39 (0.21 - 0.69)         | 0.002             | -                          | NS                |
| Hepatitis B infection                    | 1.41 (0.28 - 7.01)         | 0.676             | -                          | -                 |
| Diabetes                                 | 1.35 (1.03 - 1.76)         | 0.027             | -                          | NS                |
| Pre-existing renal disease               | 1.30 (0.97 - 1.74)         | 0.079             | -                          | NS                |
| <b>Solid malignancy</b>                  | <b>2.56 (1.87 - 3.51)</b>  | <b>&lt;0.0001</b> | <b>1.67 (1.08 - 2.56)</b>  | <b>0.020</b>      |
| <b>Leukemia</b>                          | <b>2.72 (1.20 - 6.16)</b>  | <b>0.016</b>      | <b>3.47 (1.40 - 8.64)</b>  | <b>0.008</b>      |
| Lymphoma                                 | 1.98 (0.63 - 6.29)         | 0.245             | -                          | -                 |
| Cirrhosis                                | 1.00 (0.51 - 1.97)         | 0.990             | -                          | -                 |
| <b>Metastatic cancer</b>                 | <b>3.70 (2.34 - 5.86)</b>  | <b>&lt;0.0001</b> | <b>2.54 (1.39 - 4.66)</b>  | <b>0.003</b>      |
| AIDS                                     | 0.46 (0.21 - 1.03)         | 0.060             | -                          | NS                |

<sup>1</sup>NS: Not significant



Table 4: Multivariable analysis of in-hospital and post-discharge mortality among 1114 patients with *Staphylococcus aureus* bacteremia.

| Parameter <sup>1</sup>                   | In-hospital Mortality |         | Post-discharge Mortality |                 |
|------------------------------------------|-----------------------|---------|--------------------------|-----------------|
|                                          | OR (95% CI)           | P value | OR (95% CI)              | P value         |
| Age (decades)                            | 1.54 (1.40 - 1.70)    | <0.0001 | -                        | NS <sup>2</sup> |
| Sepsis                                   | 1.62 (1.12 - 2.34)    | 0.011   | -                        | -               |
| Skin/soft tissue infection               | 0.61 (0.39 - 0.97)    | 0.036   | -                        | -               |
| Admission to ICU                         | 4.78 (3.29 - 6.95)    | <0.0001 | -                        | NS              |
| Coronary artery disease                  | -                     | NS      | -                        | -               |
| Congestive heart failure                 | -                     | -       | -                        | NS              |
| Peripheral vascular disease              | -                     | -       | 1.94 (1.19 - 3.17)       | 0.008           |
| Acute kidney injury (dialysis-dependent) | -                     | -       | -                        | NS              |
| Hepatic failure                          | 6.28 (2.44 - 16.16)   | <0.0001 | -                        | -               |
| Prolonged ventilation >21 d              | 2.16 (1.17 - 3.99)    | 0.0141  | -                        | -               |
| Operative intervention                   | -                     | -       | 0.61 (0.41 - 0.90)       | 0.012           |
| Cerebrovascular disease                  | -                     | NS      | 1.50 (1.01 - 2.23)       | 0.042           |
| Dementia                                 | -                     | NS      | -                        | NS              |
| COPD                                     | -                     | -       | 2.51 (1.61 - 3.91)       | <0.0001         |
| Liver disease                            | -                     | NS      | -                        | NS              |
| Hepatitis C infection                    | -                     | NS      | -                        | -               |
| Diabetes                                 | -                     | -       | 1.50 (1.06 - 2.11)       | 0.021           |
| Pre-existing renal disease               | -                     | -       | -                        | NS              |
| Solid malignancy                         | -                     | NS      | 1.67 (1.15 - 2.44)       | 0.007           |
| Leukemia                                 | -                     | -       | 2.93 (1.26 - 6.82)       | 0.013           |
| Metastatic cancer                        | 3.15 (1.92 - 5.16)    | <0.0001 | -                        | NS              |

<sup>1</sup> In both models, variables that were significant in the univariable analyses and clinically-significant variables were independently analyzed by logistic regression and shown in the table.

<sup>2</sup> NS: Not significant



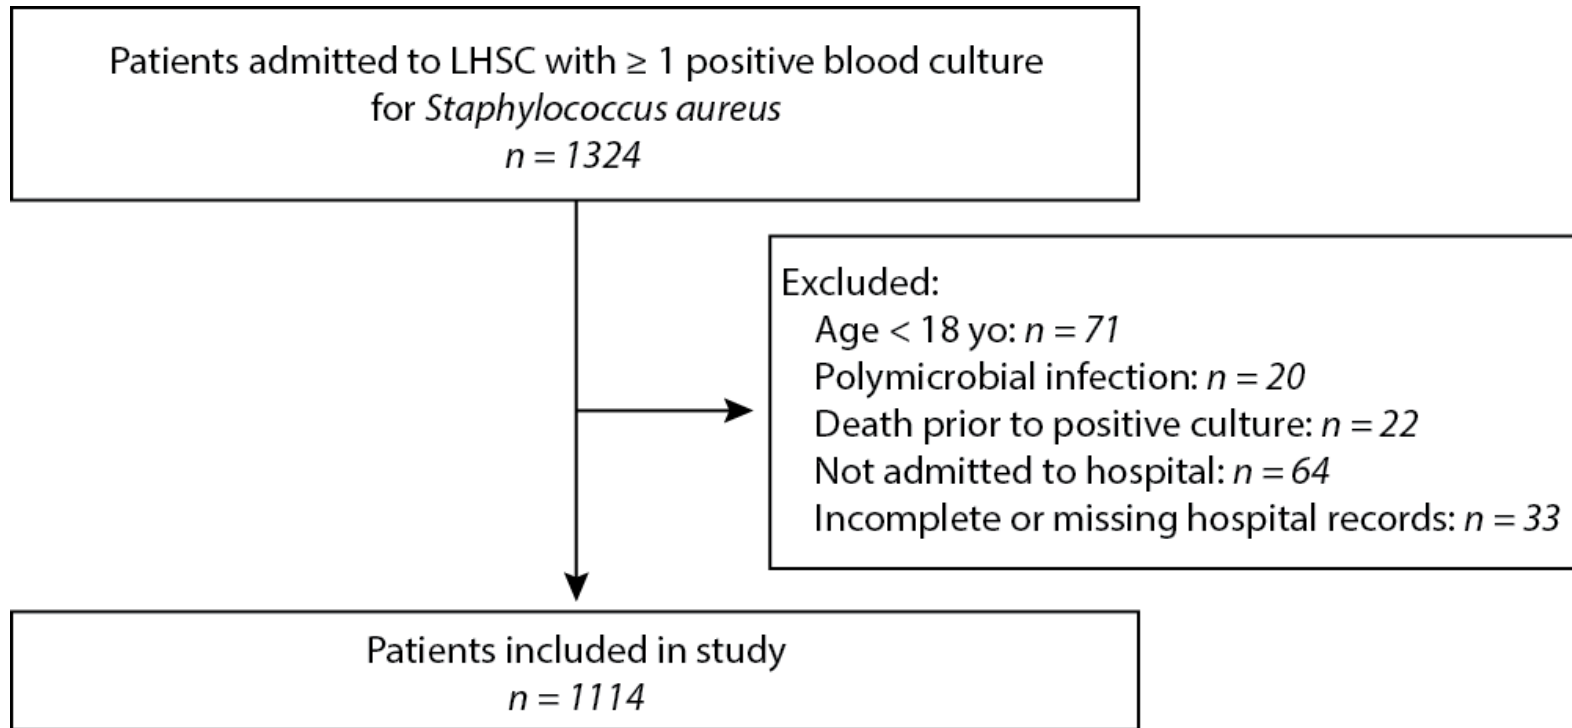

Figure 1

1  
2  
3  
4  
5  
6  
7  
8  
9  
10  
11  
12  
13  
14  
15  
16  
17  
18  
19  
20  
21  
22  
23  
24  
25  
26  
27  
28  
29  
30  
31  
32  
33  
34  
35  
36  
37  
38  
39  
40  
41  
42  
43

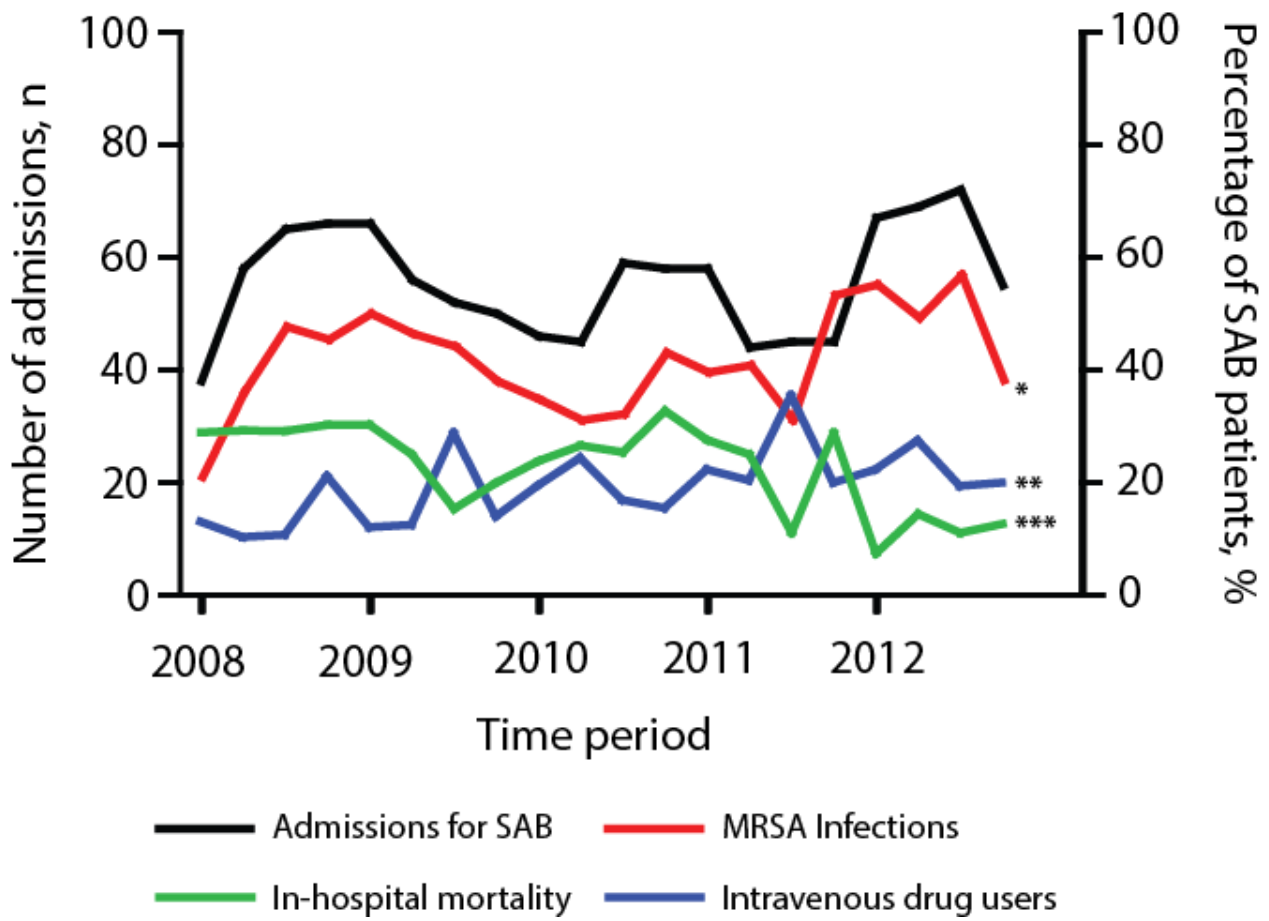

Figure 2
